# Supplementary material for: Facilitators and Barriers in Integrated Social Care for Families Facing Multiple and Complex Problems: A Scoping Review
Source: Int J Integr Care. 2024 Aug 7;24(3):13. doi: 10.5334/ijic.7768 (PMC11312847; doi:10.5334/ijic.7768)
Supplement: Appendix 1. — Search overview databases. [file ijic-24-3-7768-s1.pdf]

| Appendix 1. search overview databases                                                                                                                                                  |                                                                                                                                                                                                                                                                                                                                                                                                                                                                                                                                                                                                                                                                                                      | Web of Science      | PsycINFO            | Psychology and Behavioural Sciences Collection | CINAHL             | MEDLINE            | PubMed             |
|----------------------------------------------------------------------------------------------------------------------------------------------------------------------------------------|------------------------------------------------------------------------------------------------------------------------------------------------------------------------------------------------------------------------------------------------------------------------------------------------------------------------------------------------------------------------------------------------------------------------------------------------------------------------------------------------------------------------------------------------------------------------------------------------------------------------------------------------------------------------------------------------------|---------------------|---------------------|------------------------------------------------|--------------------|--------------------|--------------------|
| Key words                                                                                                                                                                              | Search string                                                                                                                                                                                                                                                                                                                                                                                                                                                                                                                                                                                                                                                                                        | Date:<br>28-09-2023 | Date:<br>28-09-2023 | Date:<br>28-9-2023                             | Date:<br>28-9-2023 | Date:<br>28-9-2023 | Date:<br>28-9-2023 |
| <b>(Population)</b><br><b>Families with multiple and complex problems</b><br><br><b>(Intervention)</b><br><b>Integrated social care</b><br><br><b>(Comparison)</b><br><b>(Outcome)</b> | ("multi-problem famil*" OR "multiproblem famil*" OR "famil* with multi-problem*" OR "famil* in multiple problem*" OR "multi-stressed famil*" OR "multi-crisis famil*" OR "multi-assisted famil*" OR "multiproblem famil*" OR "vulnerable famil*" OR "families with longstanding and complex*" OR "famil* with complex problems") AND (fragmentation* OR fragmented* OR integrated* OR integral* OR "multi-agency" OR "multi agency" OR interprofessional* OR collaborat* OR generalis* OR care coordinat* OR coordinat* OR multiprofessional* OR multi-disciplinary*)<br>-<br>-<br>Searchstring for PubMed                                                                                           | 140                 | 115                 | 28                                             | 124                | 99                 | 92                 |
| <b>(Patient)</b><br><b>Families with multiple and complex problems</b><br><br><b>(Intervention)</b><br><b>Integrated social care</b><br><br><b>(Comparison)</b><br><b>(Outcome)</b>    | "multi-problem famil*"[tiab] OR "multiproblem famil*"[tiab] OR "families with multi-problem*"[tiab] OR "families in multiple problem*"[tiab] OR "multi-stressed famil*"[tiab] OR "multi-crisis famil*"[tiab] OR "multi-assisted famil*"[tiab] OR "vulnerable famil*"[tiab] OR "families with longstanding and complex"[tiab] OR "families with complex problems"[tiab] AND fragmentation*[tiab] OR fragmented*[tiab] OR integrated*[tiab] OR integral*[tiab] OR "multi-agency"[tiab] OR "multi agency"[tiab] OR interprofessional*[tiab] OR collaborat*[tiab] OR generalis*[tiab] OR care coordinat*[tiab] OR coordinat*[tiab] OR "multi professional*"[tiab] OR multi-disciplinary*[tiab]<br>-<br>- |                     |                     |                                                |                    |                    |                    |
|                                                                                                                                                                                        |                                                                                                                                                                                                                                                                                                                                                                                                                                                                                                                                                                                                                                                                                                      |                     |                     |                                                |                    |                    | Tot. 598           |
