# Supplementary material for: Facilitators and Barriers in Integrated Social Care for Families Facing Multiple and Complex Problems: A Scoping Review
Source: PubMed Central journal article supplement (PMC11312847; doi:10.5334/ijic.7768), 2024-08-07
Supplement: ijic-24-3-7768-s2.pdf [file ijic-24-3-7768-s2.pdf]

|                                                                                                                                                                    |   |   |   |   |   |   |      |
|--------------------------------------------------------------------------------------------------------------------------------------------------------------------|---|---|---|---|---|---|------|
| 11. Eastwood et al. (2020b) Care coordination for vulnerable families in the Sydney local health district: what works for whom, under what circumstances, and why? | + | + | + | ± | + | + | Good |
| 12. K. Morris (2010). Troubled families: vulnerable families' experiences of multiple service use.                                                                 | + | + | + | + | + | + | Good |

| Methodological appraisal of the studies: quantitative |                                |               |                   |                     |                   |                |                      |                |                          |                              |                       |                                  |                        |                          |                              |                                       |                      |
|-------------------------------------------------------|--------------------------------|---------------|-------------------|---------------------|-------------------|----------------|----------------------|----------------|--------------------------|------------------------------|-----------------------|----------------------------------|------------------------|--------------------------|------------------------------|---------------------------------------|----------------------|
| Study                                                 | Methodological quality (items) |               |                   |                     |                   |                |                      |                |                          |                              |                       |                                  |                        |                          |                              |                                       |                      |
|                                                       | Randomization                  | Blinded incl. | Pat/clin blinding | Researcher blinding | Comparable groups |                | Sufficient follow-up |                | Analyzed in random group | Equal treatm. Contr/ interv. | Selective Publication | Excl. influence Interest parties | Agreement own patients | Feasibility own practice | (Dis)Advantages own patients | Expectations preferences own patients | # pos items of total |
|                                                       |                                |               |                   |                     | Yes               | Analysis if no | Yes                  | Analysis if no |                          |                              |                       |                                  |                        |                          |                              |                                       |                      |
| Bachler et al. (2015; RCT)                            |                                |               |                   | X                   |                   | /              | X                    | /              |                          |                              | X                     | X                                | X                      | X                        |                              | X                                     | 8/14                 |
| Bachler et al. (2017; validation study)               |                                |               |                   |                     |                   | /              | X                    | /              | X                        | X                            | X                     | X                                | X                      |                          |                              |                                       | 7/14                 |
| Tausendfreund et al. (2014; prospective study)        |                                |               |                   |                     |                   | /              | X                    | /              | X                        |                              | X                     | X                                | X                      |                          |                              |                                       | 6/14                 |
| Serbati et al. (2016; pre- and post-test)             |                                |               | X                 |                     | X                 | /              | X                    | /              | X                        | X                            | X                     | X                                |                        | X                        | X                            |                                       | 10/14                |
